# Supplementary material
Source: Elsevier journal article supplement (https://www.sciencedirect.com/science/article/pii/S2531043722000769)
Supplement: mmc1 [file S2531043722000769:mmc1.pdf]

Supplementary material

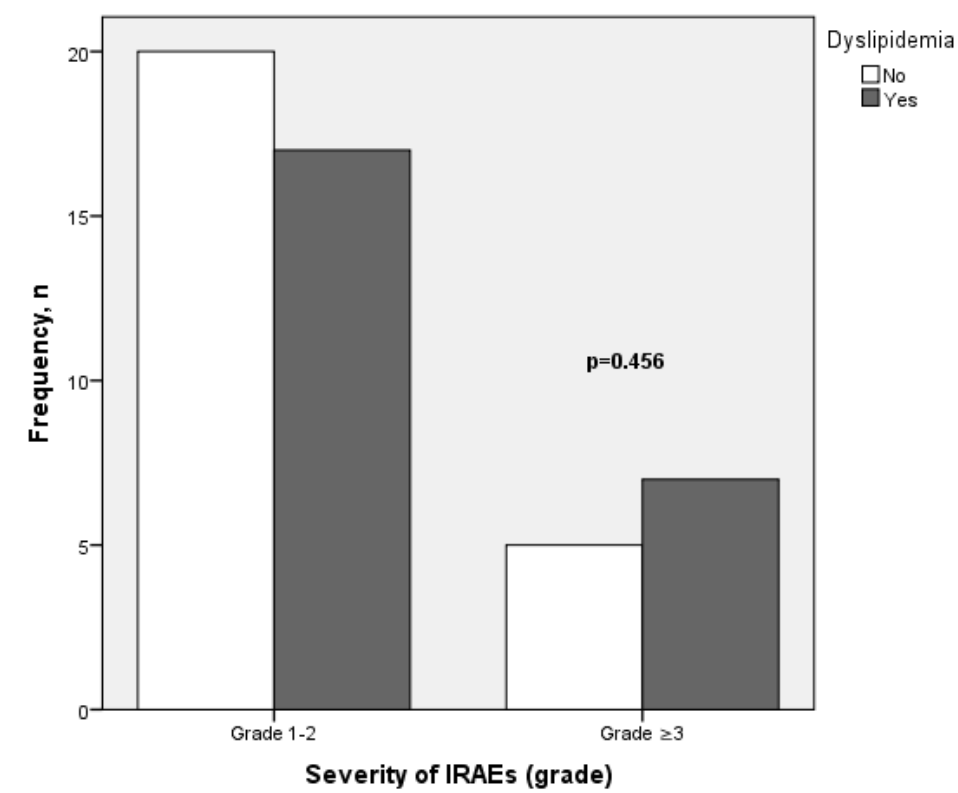

Fig.2 | Severity of IRAEs among dyslipidemic and non-dyslipidemic patients
